# Supplementary material
Source: publisher site journal article supplement (https://www.dovepress.com/article/432459)
Supplement: Supplementary file 1 [file get_supplementary_file.php]

**Table S1** Vector analysis summary at 6 months

| <b>Preoperative<br/>Cylinder</b> | <b>n</b> | <b>Absolute<br/>IRC<br/><br/>Mean ±<br/>SD</b> | <b>Absolute<br/>SIRC<br/><br/>Mean ±<br/>SD</b> | <b>Absolute<br/>EV<br/><br/>Mean ±<br/>SD</b> | <b>CR<br/><br/>Mean ±<br/>SD</b> | <b>ER<br/><br/>Mean ±<br/>SD</b> |
|----------------------------------|----------|------------------------------------------------|-------------------------------------------------|-----------------------------------------------|----------------------------------|----------------------------------|
| All                              | 124      | 0.73 ± 0.55                                    | 0.68 ± 0.48                                     | 0.19 ± 0.27                                   | 0.90 ± 0.28                      | 0.22 ± 0.37                      |
| 0.0 D to ≤ 0.5 D                 | 60       | 0.27 ± 0.21                                    | 0.34 ± 0.23                                     | 0.17 ± 0.25                                   | 0.94 ± 0.37                      | 0.30 ± 0.51                      |
| > 0.5 D to ≤ 1.0 D               | 26       | 0.78 ± 0.12                                    | 0.70 ± 0.21                                     | 0.10 ± 0.20                                   | 0.89 ± 0.22                      | 0.14 ± 0.27                      |
| > 1.0 D to ≤ 2.0 D               | 35       | 1.34 ± 0.20                                    | 1.14 ± 0.29                                     | 0.28 ± 0.34                                   | 0.86 ± 0.20                      | 0.20 ± 0.23                      |
| > 2.0 D to ≤ 3.0 D               | 3        | 2.27 ± 0.28                                    | 2.11 ± 0.53                                     | 0.16 ± 0.29                                   | 0.92 ± 0.14                      | 0.08 ± 0.14                      |

**Abbreviations:** IRC, intended refractive correction; SIRC, surgically induced refractive correction; EV, error vector (IRC-SIRC); CR, correction ratio (SIRC/IRC); ER, error ratio (EV/IRC); D, diopters

**Table S2** Error of magnitude at 6 months

| <b>Preoperative<br/>Cylinder</b> | <b>n</b> | <b>EM<br/>Mean ± SD</b> | <b>Absolute EM<br/>Mean ± SD</b> | <b>Absolute EM<br/>≤ 1.00 D<br/>n (%)</b> | <b>Absolute EM<br/>≤ 0.50 D<br/>n (%)</b> |
|----------------------------------|----------|-------------------------|----------------------------------|-------------------------------------------|-------------------------------------------|
| All                              | 124      | 0.04 ± 0.27             | 0.15 ± 0.23                      | 124 (100.0%)                              | 118 (95.2%)                               |
| 0.0 D to ≤ 0.5 D                 | 60       | -0.07 ± 0.25            | 0.14 ± 0.22                      | 60 (100.0%)                               | 58 (96.7%)                                |
| > 0.5 D to ≤ 1.0 D               | 26       | 0.08 ± 0.16             | 0.08 ± 0.16                      | 26 (100.0%)                               | 26 (100.0%)                               |
| > 1.0 D to ≤ 2.0 D               | 35       | 0.19 ± 0.29             | 0.20 ± 0.29                      | 35 (100.0%)                               | 31 (88.6%)                                |
| > 2.0 D to ≤ 3.0 D               | 3        | 0.16 ± 0.29             | 0.16 ± 0.29                      | 3 (100.0%)                                | 3 (100.0%)                                |

**Abbreviations:** EM, error of magnitude; SD, standard deviation; D, diopters

**Table S3** Error of angle at 6 months

| <b>Preoperative<br/>Cylinder</b> | <b>n</b> | <b>EA<br/>Mean ± SD</b> | <b>Absolute EA<br/>≤ 15 degrees<br/>n (%)</b> | <b>EA &gt; +15<br/>degrees<br/>n (%)</b> | <b>EA &lt; -15<br/>degrees<br/>n (%)</b> |
|----------------------------------|----------|-------------------------|-----------------------------------------------|------------------------------------------|------------------------------------------|
| All                              | 124      | 2.27 ± 17.88            | 104 (83.9%)                                   | 13 (10.5%)                               | 7 (5.6%)                                 |
| 0.0 D to ≤ 0.5 D                 | 60       | 4.83 ± 24.69            | 43 (71.7%)                                    | 12 (20%)                                 | 5 (8.3%)                                 |
| > 0.5 D to ≤ 1.0 D               | 26       | -1.83 ± 6.98            | 24 (92.3%)                                    | 1 (3.8%)                                 | 1 (3.8%)                                 |
| > 1.0 D to ≤ 2.0 D               | 35       | 1.11 ± 6.05             | 34 (97.1%)                                    | 0 (0%)                                   | 1 (2.9%)                                 |
| > 2.0 D to ≤ 3.0 D               | 3        | 0.00 ± 0.00             | 3 (100%)                                      | 0 (0%)                                   | 0 (0%)                                   |

**Abbreviations:** EA, error of angle; SD, standard deviation; D, diopters
